# Supplementary material
Source: Springer Nature journal article supplement (https://www.springermedizin.de/resource/supplementary/12885_2010_2547_MOESM1_ESM.pdf/9462542)

OS

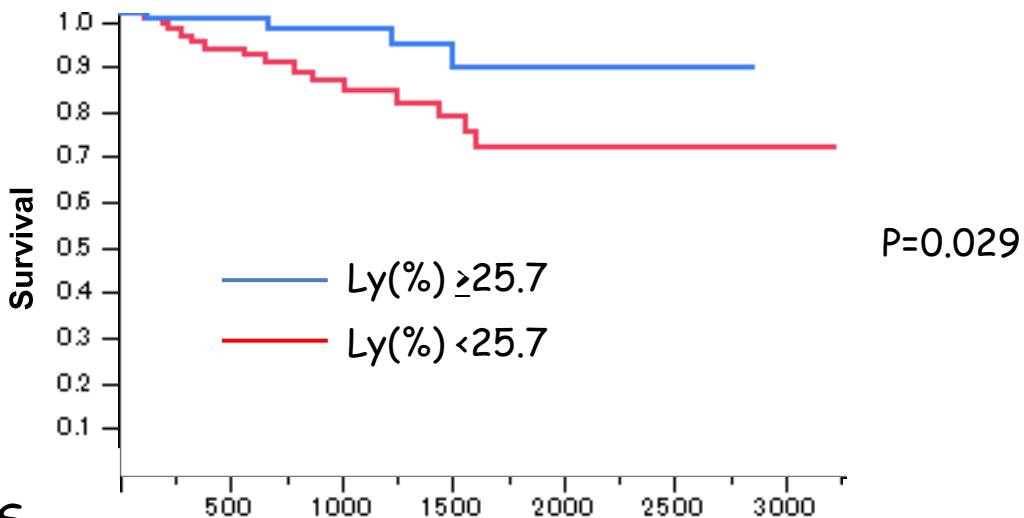

DFS

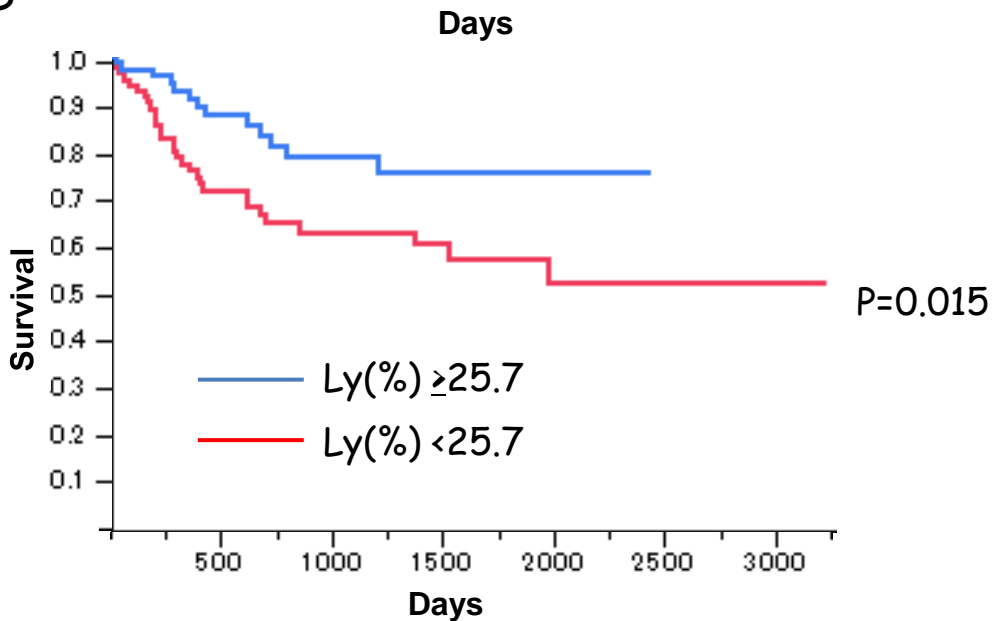

Supplement: MOESM1 [file 9462542]
